# Supplementary material for: A smart fluorescent probe for simultaneous detection of GSH and Cys in human plasma and cells
Source: Royal Society of Chemistry journal article supplement (doi:10.1039/c5ra21025a), 2015-01-01
Supplement: c5ra21025a1.pdf [file c5ra21025a1.pdf]

## **A smart fluorescent probe for simultaneous detection of GSH and Cys in human plasma and cells**

Jian Pan,<sup>‡,a</sup> Yue Zhang,<sup>‡,a</sup> Junchao Xu,<sup>a</sup> Jinbiao Liu,<sup>a</sup> Lintao Zeng,<sup>a,\*</sup> and Guang-Ming Bao<sup>b,\*</sup>

<sup>a</sup> *School of Chemistry & Chemical Engineering, Tianjin University of Technology, Tianjin, P. R. China, 300384. E-mail: [zlt1981@126.com](mailto:zlt1981@126.com).*

<sup>b</sup> *Department of Veterinary Medicine, School of Animal Science and Technology, Jiangxi Agricultural University, Nanchang 330045, P.R. China E-mail: [bycb2005@gmail.com](mailto:bycb2005@gmail.com).*

<sup>‡</sup> These authors contributed equally to this work.

### **Table of Contents**

1. <sup>1</sup>H NMR, <sup>13</sup>C NMR and HR-MS spectra of intermediates and the probe **BY-NBD**
2. HR-MS spectra of NBD-Cys and NBD-GSH
3. The fluorescence spectra of human plasma and human plasma with **BY-NBD**.

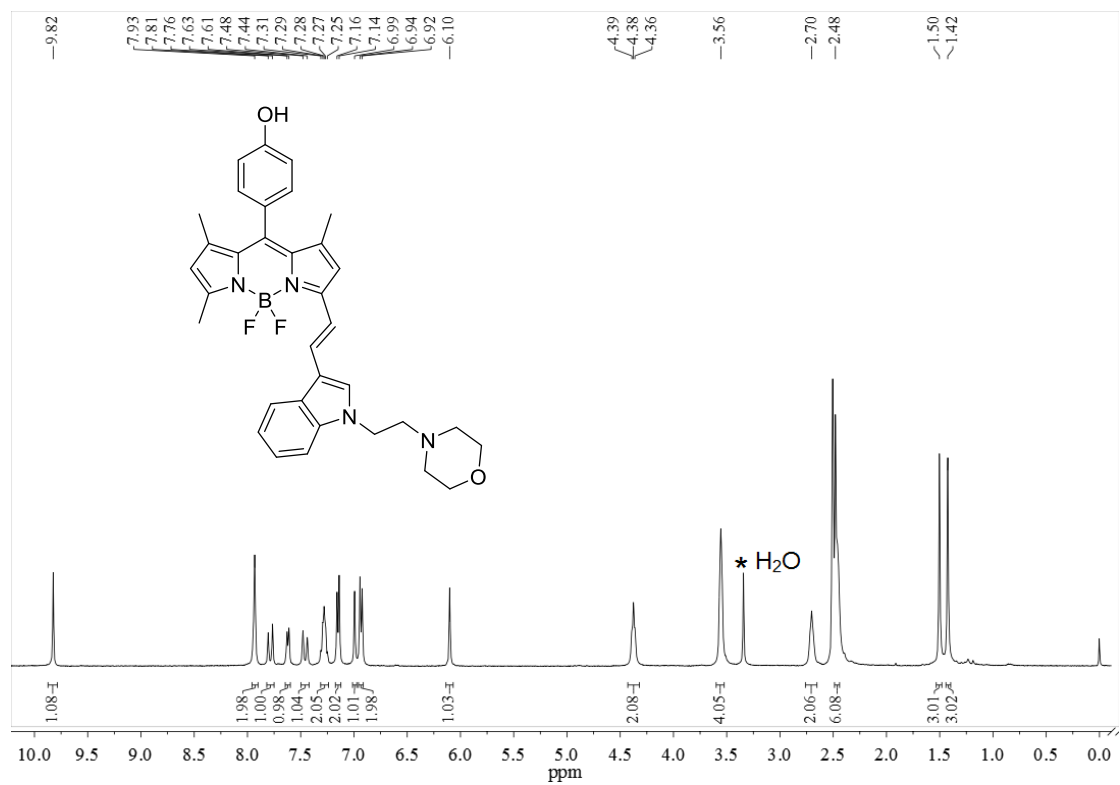

**Fig. S1**  $^1\text{H}$  NMR spectrum of indole-BODIPY in  $\text{DMSO-}d_6$  (400 MHz)

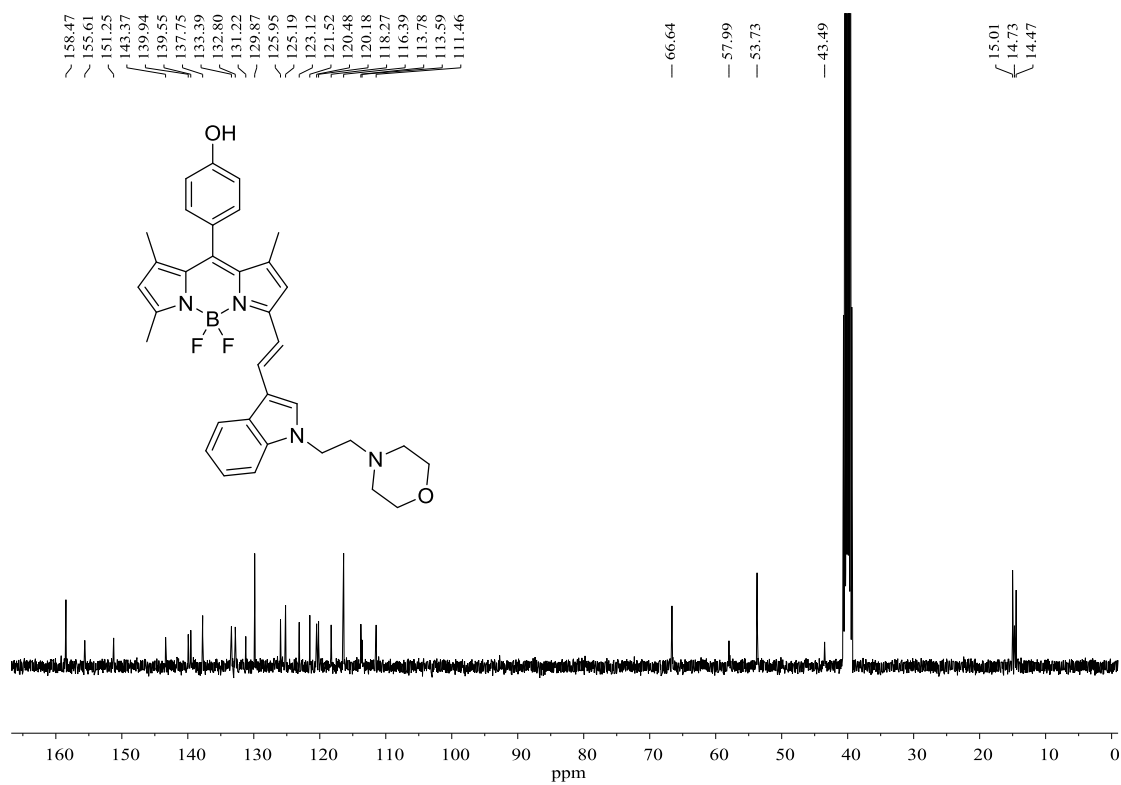

**Fig. S2**  $^{13}\text{C}$  NMR spectrum of indole-BODIPY in  $\text{DMSO-}d_6$  (100 MHz)

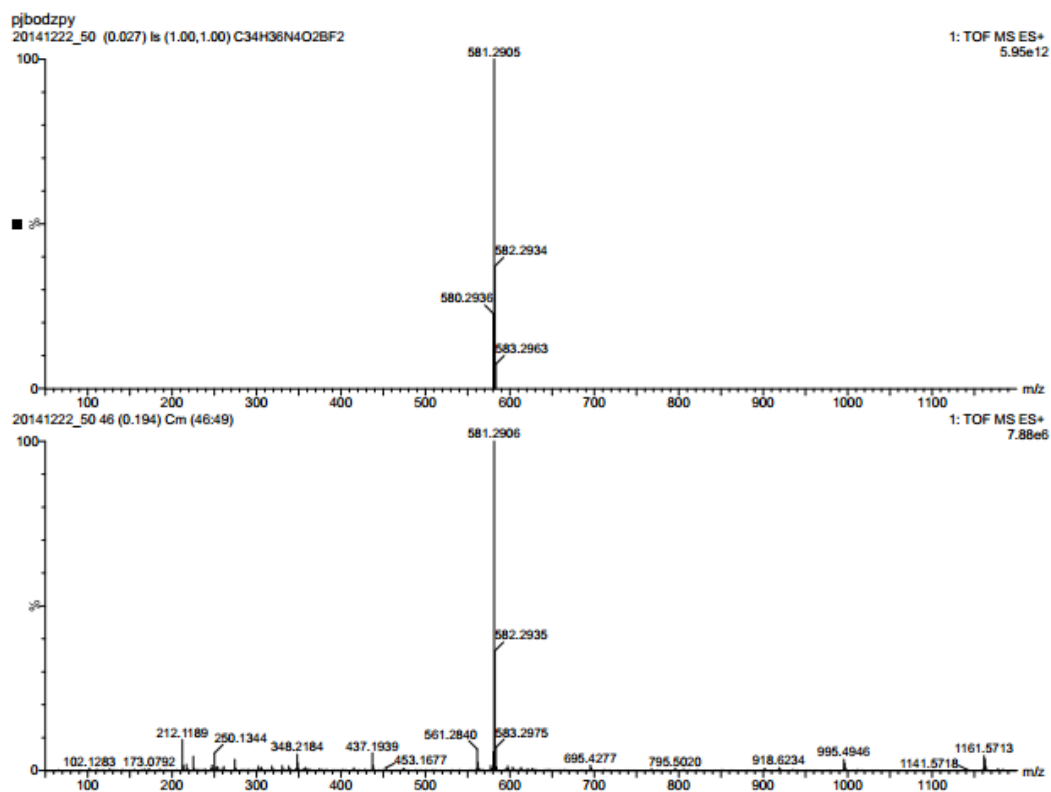

**Fig. S3** HR-MS (ESI) spectrum of indole-BODIPY

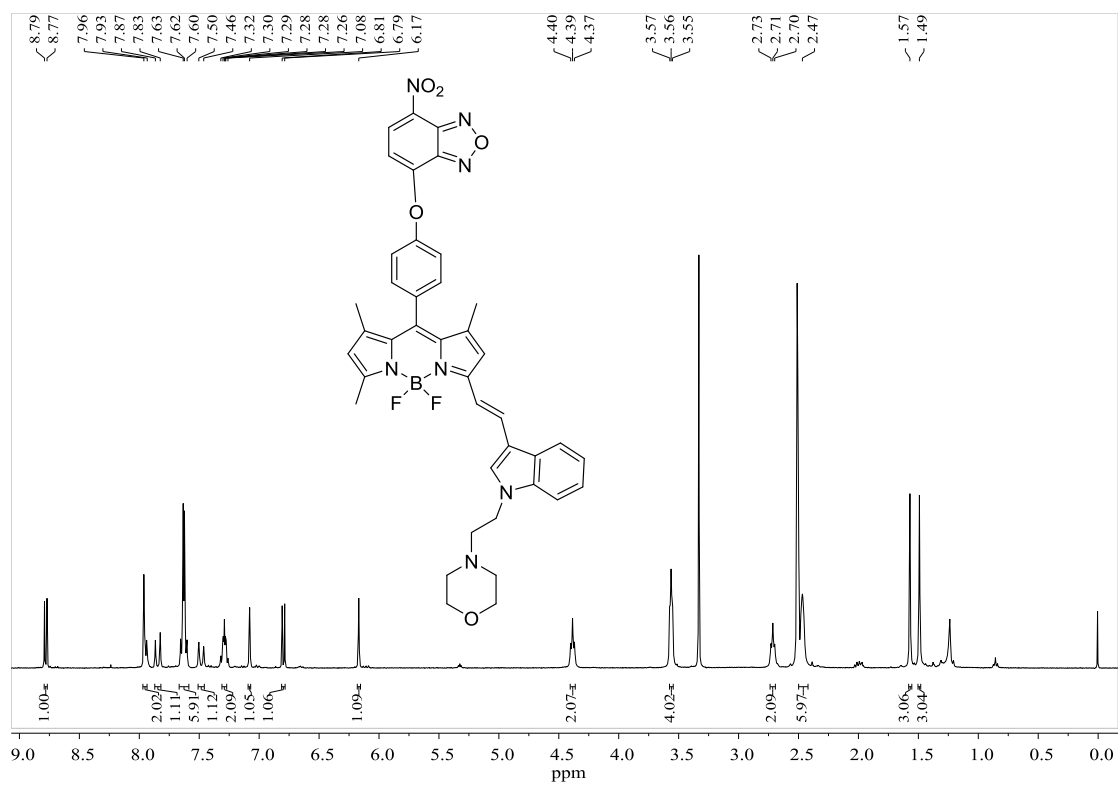

**Fig. S4.** <sup>1</sup>H NMR spectrum of the probe **BY-NBD** in DMSO-*d*<sub>6</sub> (400 MHz)

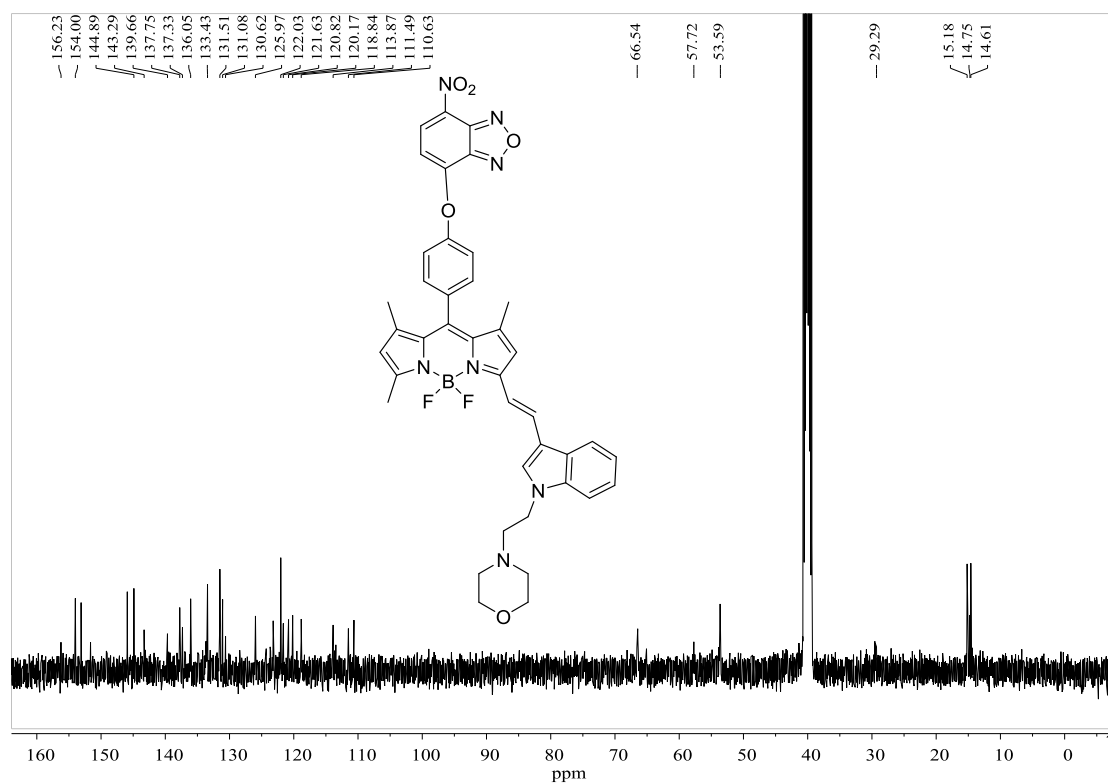

**Fig. S5.** <sup>13</sup>C NMR spectrum of the probe **BY-NBD** in DMSO-*d*<sub>6</sub> (100 MHz)

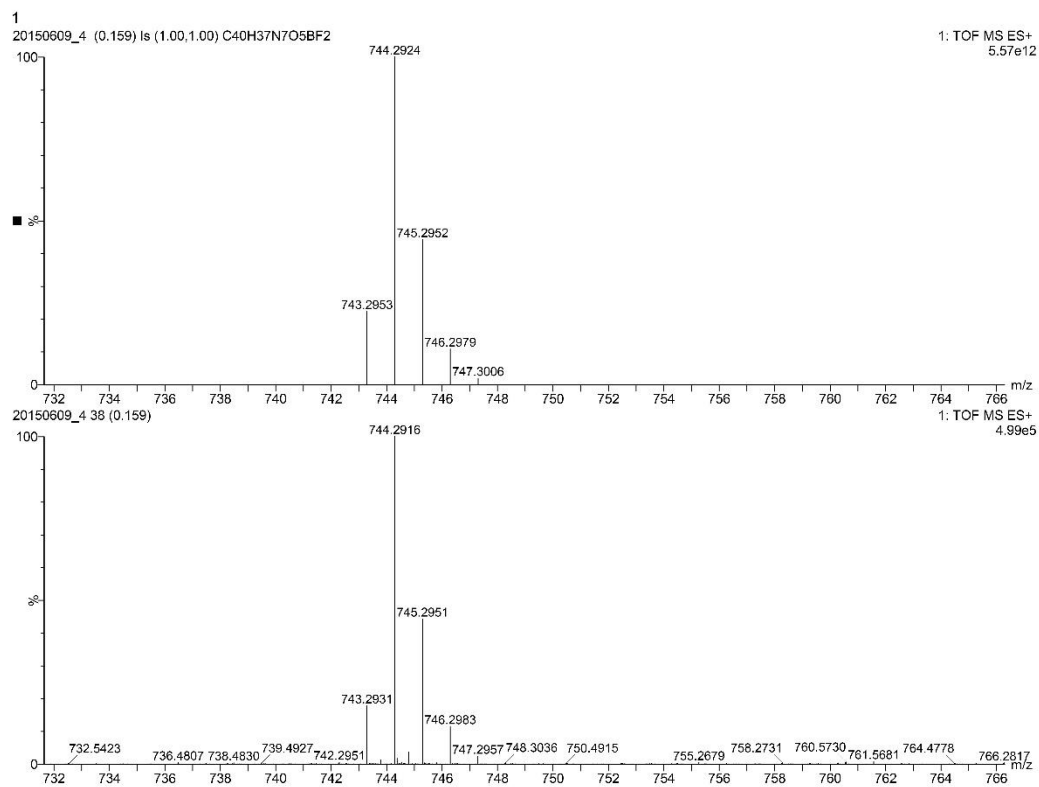

**Fig. S6.** HR-MS (ESI) spectrum of the probe **BY-NBD**

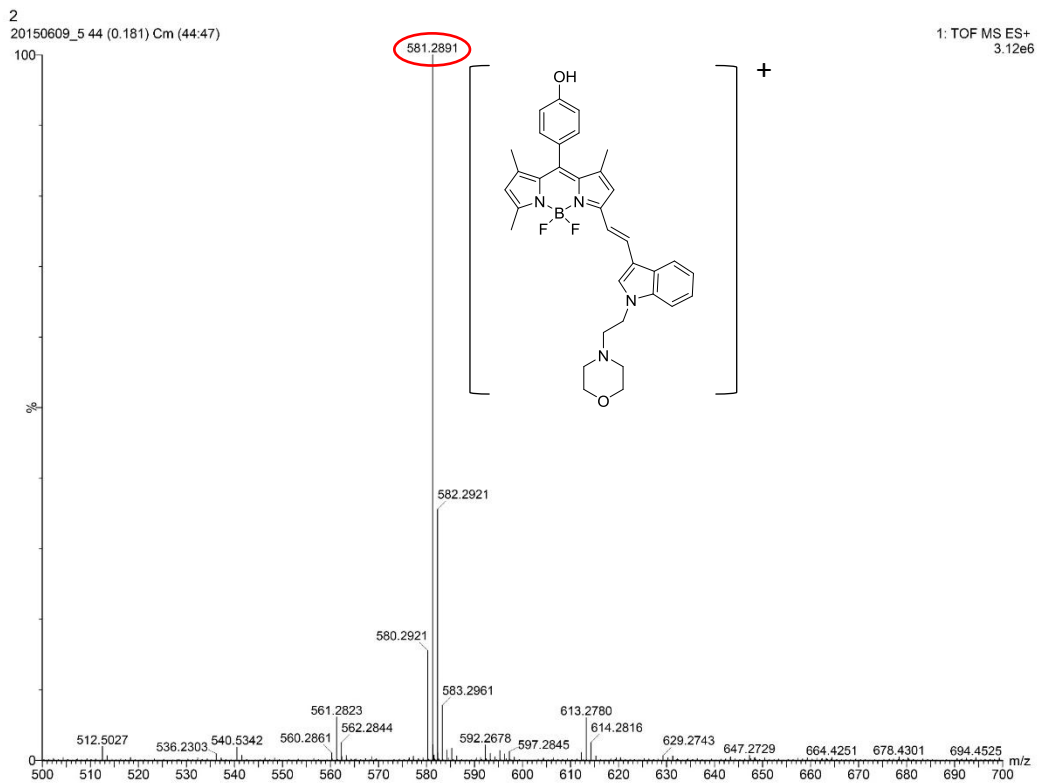

**Fig. S7.** HR-MS (ESI) spectrum of reaction products of the probe **BY-NBD** with  
Cys/GSH

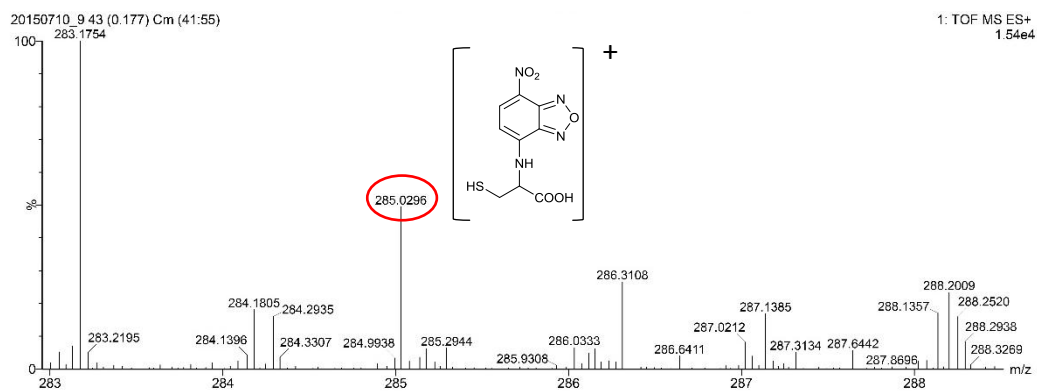

**Fig. S8.** HR-MS (ESI) spectrum of NBD-Cys

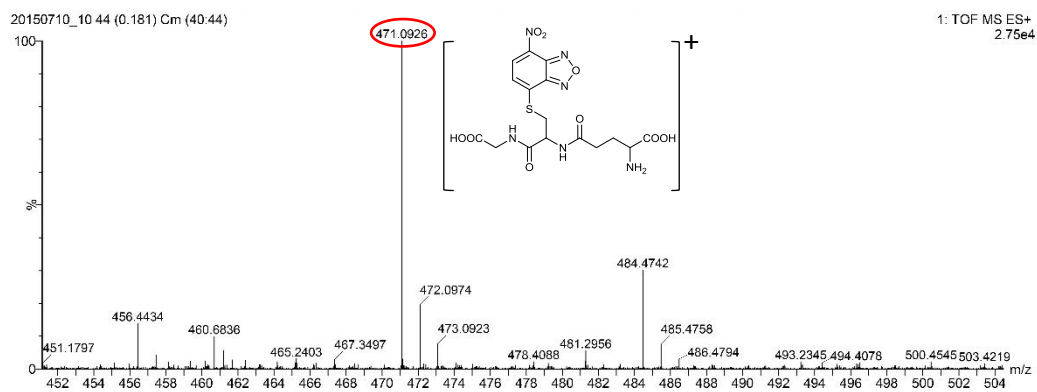

**Fig. S9.** HR-MS (ESI) spectrum of NBD-GSH

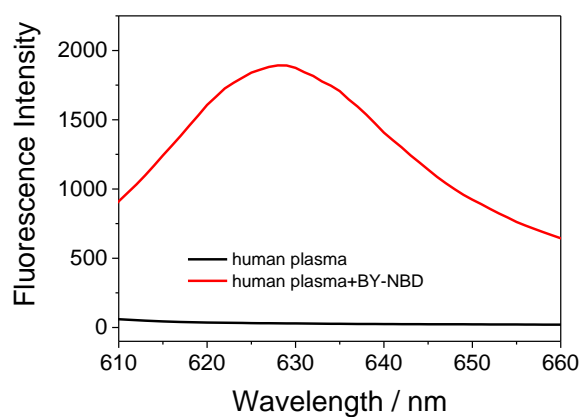

**Fig. S10.** The fluorescence spectra of human plasma and human plasma with BY-NBD
